# Supplementary material for: Cognitive reflection correlates with behavior on Twitter
Source: Nat Commun. 2021 Feb 10;12:921. doi: 10.1038/s41467-020-20043-0 (PMC7875970; doi:10.1038/s41467-020-20043-0)
Supplement: Supplementary file 1 — Supplementary Information [file 41467_2020_20043_MOESM1_ESM.pdf]

*Supplementary Information*

**“Cognitive reflection correlates with behavior on Twitter”**

Mosleh<sup>1,2</sup> et al.

1 SITE (Science, Innovation, Technology, and Entrepreneurship) Department, University of Exeter Business School, Exeter EX4 4PU, UK

2 Sloan School of Management, Massachusetts Institute of Technology, Cambridge, MA 02138

E-mail: [mmosleh@mit.edu](mailto:mmosleh@mit.edu)

## 1. Supplementary Figures

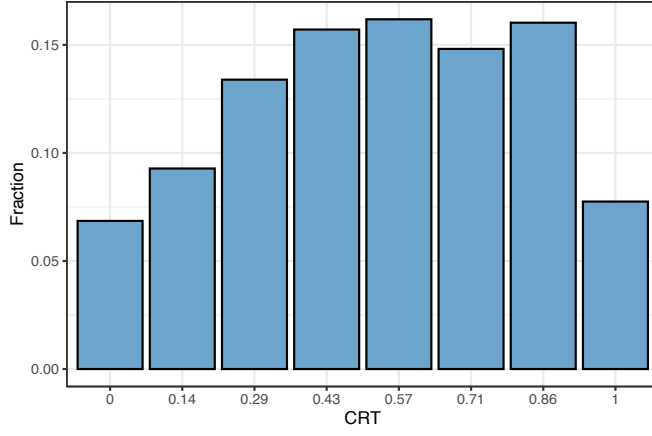

**Supplementary Figure 1. Distribution of users' CRT score in our sample.** Shown here is the distribution of proportion of correct answers given to the CRT questionnaire by individual subjects in our study.

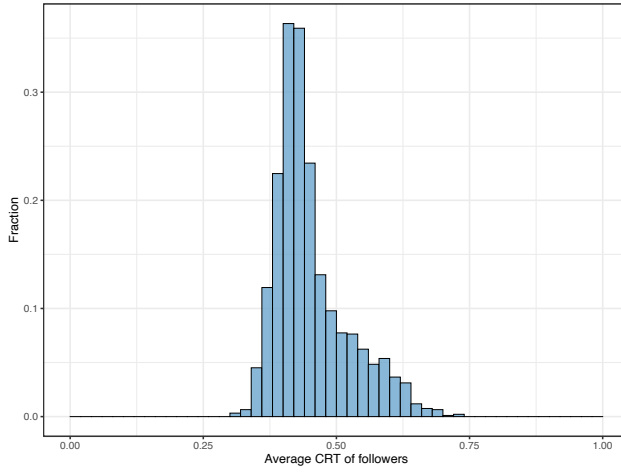

**Supplementary Figure 2. Distribution of average CRT score of followers in the co-follower network.** Shown here is the distribution of average CRT score of followers for each account in the co-follower network. This includes accounts followed by at least 25 users in our dataset ( $K=25$ ).

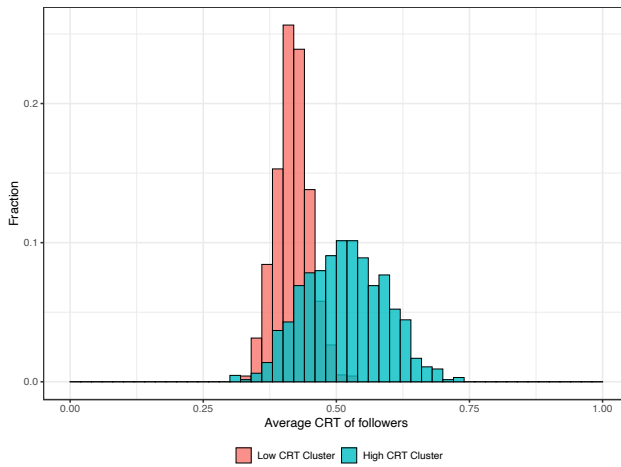

**Supplementary Figure 3. Distribution of average CRT of followers in clusters of the co-follower network.** Shown here are distributions of average CRT score of followers for two clusters within the co-follower network including accounts followed by at least 25 users in our dataset. There are one cluster of accounts that is mostly followed by users who scored lower in the CRT (narrower distribution) and one cluster of accounts that is mostly followed by users who scored mixed (both high and low) in the CRT (wider distribution).

## 2. Supplementary Tables

**Supplementary Table 1. Descriptive statistics for all variables.** Reported here are descriptive statistics of subjects' scores on the Cognitive Reflection Test, demographic information, and time to complete the survey.

|                                          | <i>Mean</i> | <i>Median</i> | <i>STD</i> | <i>Min</i> | <i>Max</i> |
|------------------------------------------|-------------|---------------|------------|------------|------------|
| <i>CRT</i>                               | .532        | .571          | .287       | 0          | 1          |
| <i>Age</i>                               | 34.128      | 33            | 11.224     | 18         | 66         |
| <i>Gender (female)</i>                   | .554        | 1             | .486       | 0          | 1          |
| <i>Ethnicity (white)</i>                 | .834        | 1             | .371       | 0          | 1          |
| <i>Political ideology (conservatism)</i> | 2.448       | 2.5           | .918       | 1          | 5          |
| <i>US residency</i>                      | .182        | 0             | .386       | 0          | 1          |
| <i>Education (college degree)</i>        | .611        | 1             | .488       | 0          | 1          |
| <i>Income</i>                            | 4.539       | 5             | 1.809      | 1          | 10         |
| <i>Log (time to complete survey)</i>     | 6.673       | 6.645         | .463       | 4.934      | 1.885      |

**Supplementary Table 2. Correlation of (z-scored) covariates with CRT.** Reported here are coefficients and p-values from Pearson correlation two-sided test (results are not adjusted for multi-comparisons).

|                                          | <i>r</i> | <i>p</i>       |
|------------------------------------------|----------|----------------|
| <i>Age</i>                               | -.076    | <b>9.0e-04</b> |
| <i>Gender (female)</i>                   | -.106    | <b>3.4e-06</b> |
| <i>Ethnicity (white)</i>                 | .058     | <b>1.1e-02</b> |
| <i>Political ideology (conservatism)</i> | -.073    | <b>1.5e-03</b> |
| <i>US residency</i>                      | <.001    | .989           |
| <i>Education (college degree)</i>        | .105     | <b>4.8e-06</b> |
| <i>Income</i>                            | .050     | <b>2.9e-02</b> |
| <i>Log (time to complete the survey)</i> | .048     | <b>3.8e-02</b> |

**Supplementary Table 3. Test for overdispersion of count data. P-values are reported from Pearson's Chi-Squared test.**

|                                      | <i>Mean</i> | <i>Variance</i> | <i>Variance to<br/>mean ratio</i> | <i>Dispersion<br/>rate</i> | <i>p value</i> |
|--------------------------------------|-------------|-----------------|-----------------------------------|----------------------------|----------------|
| <i>Followed count</i>                | 398.981     | 586,503.400     | 1,470.003                         | 1,420.911                  | <b>0.0e+00</b> |
| <i>Followers count</i>               | 208.842     | 245,013.300     | 1,173.201                         | 1,173.946                  | <b>0.0e+00</b> |
| <i>Tweets count</i>                  | 4,014.138   | 294,920,100.000 | 73,470.359                        | 62,713.881                 | <b>0.0e+00</b> |
| <i>Favorites count</i>               | 1,987.505   | 46,479,060.000  | 23,385.634                        | 23,472.891                 | <b>0.0e+00</b> |
| <i>Listed count</i>                  | 8.285       | 1,208.063       | 145.821                           | 144.331                    | <b>0.0e+00</b> |
| <i>Tweets in past two<br/>weeks</i>  | 22.912      | 9,206.998       | 401.837                           | 375.472                    | <b>0.0e+00</b> |
| <i>Number of days on<br/>Twitter</i> | 2,355.463   | 1,146,860.000   | 486.894                           | 486.970                    | <b>0.0e+00</b> |

**Supplementary Table 4. Followed count.** Results are generated using negative binominal regression taking users' z-scored CRT score as independent variable. Model 1) no controls; Model 2) controlling for age, gender, and ethnicity; Model 3) controlling for age, gender, ethnicity, US residency, education, social/economic conservatism, Income, and Log (time to complete the survey). *p*-values are reported based on two-tailed z-test and are also adjusted for multi-comparisons:  $p_{BH}$  is corrected *p*-value using Bonferroni-Holms and  $p_{Holm}$  using Benjamini Hochberg procedure.

|                                                  | Model 1        |                |                |                | Model 2         |                |                |                | Model 3         |                |                |                |
|--------------------------------------------------|----------------|----------------|----------------|----------------|-----------------|----------------|----------------|----------------|-----------------|----------------|----------------|----------------|
|                                                  | IRR<br>(SE)    | <i>p</i>       | $p_{BH}$       | $p_{Holm}$     | IRR<br>(SE)     | <i>p</i>       | $p_{BH}$       | $p_{Holm}$     | IRR<br>(SE)     | <i>p</i>       | $p_{BH}$       | $p_{Holm}$     |
| <i>CRT</i>                                       | .844<br>(.035) | <b>4.6e-05</b> | <b>3.2e-04</b> | <b>3.2e-04</b> | .867<br>(.035)  | <b>4.3e-04</b> | <b>3.0e-03</b> | <b>3.0e-03</b> | .867<br>(.036)  | <b>5.6e-04</b> | <b>3.9e-03</b> | <b>3.9e-03</b> |
| <i>Age</i>                                       |                |                |                |                | 1.168<br>(.044) | <b>3.5e-05</b> | <b>8.2e-05</b> | <b>1.8e-04</b> | 1.189<br>(.045) | <b>5.7e-06</b> | <b>1.3e-05</b> | <b>2.8e-05</b> |
| <i>Gender<br/>(female)</i>                       |                |                |                |                | 1.164<br>(.049) | <b>3.3e-04</b> | <b>5.8e-04</b> | <b>1.4e-03</b> | 1.144<br>(.049) | <b>1.7e-03</b> | <b>4.0e-03</b> | <b>8.5e-03</b> |
| <i>Ethnicity<br/>(white)</i>                     |                |                |                |                | 1.156<br>(.053) | <b>1.4e-03</b> | <b>3.1e-03</b> | <b>7.0e-03</b> | 1.129<br>(.051) | <b>7.0e-03</b> | <b>1.2e-02</b> | <b>2.8e-02</b> |
| <i>Political<br/>ideology<br/>(conservatism)</i> |                |                |                |                |                 |                |                |                | .954<br>(.046)  | .332           | .387           | .876           |
| <i>US residency</i>                              |                |                |                |                |                 |                |                |                | .950<br>(.046)  | .293           | .684           | 1              |
| <i>Education<br/>(college<br/>degree)</i>        |                |                |                |                |                 |                |                |                | 1.011<br>(.043) | .796           | .796           | 1              |
| <i>Income</i>                                    |                |                |                |                |                 |                |                |                | .958<br>(.042)  | .326           | .456           | .978           |
| <i>Log (time to<br/>complete the<br/>survey)</i> |                |                |                |                |                 |                |                |                | .966<br>(.048)  | .481           | .481           | .752           |

**Supplementary Table 5. Followers count.** Results are generated using negative binominal regression taking users' z-scored CRT score as independent variable. Model 1) no controls; Model 2) controlling for age, gender, and ethnicity; Model 3) controlling for age, gender, ethnicity, US residency, education, social/economic conservatism, Income, and Log (time to complete the survey). *p*-values are reported based on two-tailed z-test and are also adjusted for multi-comparisons: *p*<sub>BH</sub> is corrected *p*-value using Bonferroni-Holms and *p*<sub>Holm</sub> using Benjamini Hochberg procedure.

|                                         | Model 1        |          |                        |                          | Model 2         |                |                        |                          | Model 3         |                |                        |                          |
|-----------------------------------------|----------------|----------|------------------------|--------------------------|-----------------|----------------|------------------------|--------------------------|-----------------|----------------|------------------------|--------------------------|
|                                         | IRR<br>(SE)    | <i>p</i> | <i>p</i> <sub>BH</sub> | <i>p</i> <sub>Holm</sub> | IRR<br>(SE)     | <i>p</i>       | <i>p</i> <sub>BH</sub> | <i>p</i> <sub>Holm</sub> | IRR<br>(SE)     | <i>p</i>       | <i>p</i> <sub>BH</sub> | <i>p</i> <sub>Holm</sub> |
| CRT                                     | .956<br>(.049) | .375     | .454                   | 1                        | .985<br>(.048)  | .752           | .752                   | 1                        | .965<br>(.045)  | .447           | .447                   | .96                      |
| Age                                     |                |          |                        |                          | 1.111<br>(.059) | <b>4.7e-02</b> | .066                   | .141                     | 1.143<br>(.065) | <b>1.8e-02</b> | <b>3.2e-02</b>         | .072                     |
| Gender<br>(female)                      |                |          |                        |                          | 1.155<br>(.065) | <b>1.0e-02</b> | <b>1.2e-02</b>         | <b>2.0e-02</b>           | 1.129<br>(.059) | <b>2.1e-02</b> | <b>2.4e-02</b>         | <b>4.2e-02</b>           |
| Ethnicity<br>(white)                    |                |          |                        |                          | 1.182<br>(.063) | <b>1.8e-03</b> | <b>3.1e-03</b>         | <b>7.2e-03</b>           | 1.176<br>(.062) | <b>2.0e-03</b> | <b>4.8e-03</b>         | <b>1.0e-02</b>           |
| Political<br>ideology<br>(conservatism) |                |          |                        |                          |                 |                |                        |                          | .84<br>(.054)   | <b>6.7e-03</b> | <b>1.6e-02</b>         | <b>3.4e-02</b>           |
| US residency                            |                |          |                        |                          |                 |                |                        |                          | .984<br>(.064)  | .798           | .931                   | 1                        |
| Education<br>(college<br>degree)        |                |          |                        |                          |                 |                |                        |                          | 1.124<br>(.057) | <b>2.2e-02</b> | .084                   | .154                     |
| Income                                  |                |          |                        |                          |                 |                |                        |                          | 1.018<br>(.049) | .719           | .839                   | 1                        |
| Log (time to<br>complete the<br>survey) |                |          |                        |                          |                 |                |                        |                          | .965<br>(.046)  | <b>3.9e-02</b> | .084                   | .222                     |

**Supplementary Table 6. Tweets count.** Results are generated using negative binominal regression taking users' z-scored CRT score as independent variable. Model 1) no controls; Model 2) controlling for age, gender, and ethnicity; Model 3) controlling for age, gender, ethnicity, US residency, education, social/economic conservatism, Income, and Log (time to complete the survey). p-values are reported based on two-tailed z-test and are also adjusted for multi-comparisons:  $p_{BH}$  is corrected p-value using Bonferroni-Holms and  $p_{Holm}$  using Benjamini Hochberg procedure.

|                                         | Model 1        |                |          |            | Model 2         |                |                |                | Model 3         |                |                |                |
|-----------------------------------------|----------------|----------------|----------|------------|-----------------|----------------|----------------|----------------|-----------------|----------------|----------------|----------------|
|                                         | IRR<br>(SE)    | <i>p</i>       | $p_{BH}$ | $p_{Holm}$ | IRR<br>(SE)     | <i>p</i>       | $p_{BH}$       | $p_{Holm}$     | IRR<br>(SE)     | <i>p</i>       | $p_{BH}$       | $p_{Holm}$     |
| CRT                                     | .799<br>(.082) | <b>2.8e-02</b> | .072     | .174       | .878<br>(.079)  | .147           | .262           | .735           | .894<br>(.09)   | .266           | .341           | .96            |
| Age                                     |                |                |          |            | 1.004<br>(.067) | .957           | .957           | .957           | 1.05<br>(.081)  | .522           | .522           | .522           |
| Gender<br>(female)                      |                |                |          |            | 1.472<br>(.097) | <b>4.4e-09</b> | <b>3.1e-08</b> | <b>3.1e-08</b> | 1.423<br>(.100) | <b>4.7e-07</b> | <b>2.9e-06</b> | <b>3.3e-06</b> |
| Ethnicity<br>(white)                    |                |                |          |            | 1.251<br>(.077) | <b>2.8e-04</b> | <b>9.7e-04</b> | <b>1.7e-03</b> | 1.215<br>(.075) | <b>1.6e-03</b> | <b>4.8e-03</b> | <b>9.7e-03</b> |
| Political<br>ideology<br>(conservatism) |                |                |          |            |                 |                |                |                | .849<br>(.087)  | .108           | .189           | .432           |
| US residency                            |                |                |          |            |                 |                |                |                | .981<br>(.064)  | .769           | .931           | 1              |
| Education<br>(college<br>degree)        |                |                |          |            |                 |                |                |                | .976<br>(.078)  | .758           | .796           | 1              |
| Income                                  |                |                |          |            |                 |                |                |                | .887<br>(.067)  | .111           | .228           | .600           |
| Log (time to<br>complete the<br>survey) |                |                |          |            |                 |                |                |                | .873<br>(.093)  | .200           | .280           | .600           |

**Supplementary Table 7. Favorites.** Results are generated using negative binominal regression taking users' z-scored CRT score as independent variable. Model 1) no controls; Model 2) controlling for age, gender, and ethnicity; Model 3) controlling for age, gender, ethnicity, US residency, education, social/economic conservatism, Income, and Log (time to complete the survey). p-values are reported based on two-tailed z-test and are also adjusted for multi-comparisons:  $p_{BH}$  is corrected p-value using Bonferroni-Holms and  $p_{Holm}$  using Benjamini Hochberg procedure.

|                                         | Model 1         |          |          |            | Model 2         |                |                |                | Model 3         |                |                |                |
|-----------------------------------------|-----------------|----------|----------|------------|-----------------|----------------|----------------|----------------|-----------------|----------------|----------------|----------------|
|                                         | IRR<br>(SE)     | <i>p</i> | $p_{BH}$ | $p_{Holm}$ | IRR.<br>(SE)    | <i>p</i>       | $p_{BH}$       | $p_{Holm}$     | IRR<br>(SE)     | <i>p</i>       | $p_{BH}$       | $p_{Holm}$     |
| CRT                                     | 1.067<br>(.084) | .411     | .454     | 1          | 1.096<br>(.084) | .236           | .33            | .735           | 1.099<br>(.082) | .204           | .341           | .96            |
| Age                                     |                 |          |          |            | .792<br>(.085)  | <b>3.1e-02</b> | .054           | .124           | .84<br>(.087)   | .092           | .129           | .276           |
| Gender<br>(female)                      |                 |          |          |            | 1.357<br>(.114) | <b>2.7e-04</b> | <b>5.8e-04</b> | <b>1.4e-03</b> | 1.269<br>(.1)   | <b>2.6e-03</b> | <b>4.5e-03</b> | <b>1.0e-02</b> |
| Ethnicity<br>(white)                    |                 |          |          |            | 1.007<br>(.086) | .939           | .939           | .939           | 1.022<br>(.079) | .782           | .782           | .782           |
| Political<br>ideology<br>(conservatism) |                 |          |          |            |                 |                |                |                | .714<br>(.059)  | <b>4.7e-05</b> | <b>3.3e-04</b> | <b>3.3e-04</b> |
| US residency                            |                 |          |          |            |                 |                |                |                | 1.038<br>(.076) | .608           | .931           | 1              |
| Education<br>(college<br>degree)        |                 |          |          |            |                 |                |                |                | .878<br>(.065)  | .078           | .182           | .390           |
| Income                                  |                 |          |          |            |                 |                |                |                | .87<br>(.074)   | .100           | .228           | .600           |
| Log (time to<br>complete the<br>survey) |                 |          |          |            |                 |                |                |                | .882<br>(.056)  | <b>4.8e-02</b> | .084           | .222           |

**Supplementary Table 8. Listed count.** Results are generated using negative binominal regression taking users' z-scored CRT score as independent variable. Model 1) no controls; Model 2) controlling for age, gender, and ethnicity; Model 3) controlling for age, gender, ethnicity, US residency, education, social/economic conservatism, Income, and Log (time to complete the survey). *p*-values are reported based on two-tailed z-test and are also adjusted for multi-comparisons:  $p_{BH}$  is corrected *p*-value using Bonferroni-Holms and  $p_{Holm}$  using Benjamini Hochberg procedure.

|                                         | Model 1      |          |          |            | Model 2         |                |                |                | Model 3         |                |                |                |
|-----------------------------------------|--------------|----------|----------|------------|-----------------|----------------|----------------|----------------|-----------------|----------------|----------------|----------------|
|                                         | IRR<br>(SE)  | <i>p</i> | $p_{BH}$ | $p_{Holm}$ | IRR<br>(SE)     | <i>p</i>       | $p_{BH}$       | $p_{Holm}$     | IRR<br>(SE)     | <i>p</i>       | $p_{BH}$       | $p_{Holm}$     |
| CRT                                     | .902<br>(.1) | .352     | .454     | 1          | .954<br>(.091)  | .617           | .72            | 1              | .891<br>(.098)  | .292           | .341           | .96            |
| Age                                     |              |          |          |            | 1.539<br>(.123) | <b>6.3e-08</b> | <b>2.2e-07</b> | <b>3.8e-07</b> | 1.569<br>(.131) | <b>7.4e-08</b> | <b>2.6e-07</b> | <b>4.5e-07</b> |
| Gender<br>(female)                      |              |          |          |            | 1.433<br>(.137) | <b>1.7e-04</b> | <b>5.8e-04</b> | <b>1.0e-03</b> | 1.464<br>(.113) | <b>8.4e-07</b> | <b>2.9e-06</b> | <b>5.1e-06</b> |
| Ethnicity<br>(white)                    |              |          |          |            | 1.5<br>(.131)   | <b>3.2e-06</b> | <b>2.2e-05</b> | <b>2.2e-05</b> | 1.546<br>(.127) | <b>1.1e-07</b> | <b>7.6e-07</b> | <b>7.6e-07</b> |
| Political<br>ideology<br>(conservatism) |              |          |          |            |                 |                |                |                | .879<br>(.108)  | .292           | .387           | .876           |
| US residency                            |              |          |          |            |                 |                |                |                | 1.178<br>(.131) | .142           | .497           | .852           |
| Education<br>(college<br>degree)        |              |          |          |            |                 |                |                |                | 1.198<br>(.096) | <b>2.4e-02</b> | .084           | .154           |
| Income                                  |              |          |          |            |                 |                |                |                | 1.015<br>(.089) | .864           | .864           | 1              |
| Log (time to<br>complete the<br>survey) |              |          |          |            |                 |                |                |                | .885<br>(.122)  | .376           | .439           | .752           |

**Supplementary Table 9. Tweets in past two weeks.** Results are generated using negative binominal regression taking users' z-scored CRT score as independent variable. Model 1) no controls; Model 2) controlling for age, gender, and ethnicity; Model 3) controlling for age, gender, ethnicity, US residency, education, social/economic conservatism, Income, and Log (time to complete the survey). *p*-values are reported based on two-tailed z-test and are also adjusted for multi-comparisons:  $p_{BH}$  is corrected *p*-value using Bonferroni-Holms and  $p_{Holm}$  using Benjamini Hochberg procedure.

|                                         | Model 1        |                |          |            | Model 2         |                |                |                | Model 3         |                |                |                |
|-----------------------------------------|----------------|----------------|----------|------------|-----------------|----------------|----------------|----------------|-----------------|----------------|----------------|----------------|
|                                         | IRR<br>(SE)    | <i>p</i>       | $p_{BH}$ | $p_{Holm}$ | IRR<br>(SE)     | <i>p</i>       | $p_{BH}$       | $p_{Holm}$     | IRR<br>(SE)     | <i>p</i>       | $p_{BH}$       | $p_{Holm}$     |
| CRT                                     | .811<br>(.079) | <b>3.1e-02</b> | .072     | .174       | .845<br>(.08)   | .075           | .262           | .45            | .865<br>(.096)  | .192           | .341           | .96            |
| Age                                     |                |                |          |            | 1.125<br>(.121) | .274           | .32            | .548           | 1.175<br>(.129) | .143           | .167           | .286           |
| Gender<br>(female)                      |                |                |          |            | 1.238<br>(.12)  | <b>2.8e-02</b> | <b>2.8e-02</b> | <b>2.8e-02</b> | 1.155<br>(.109) | .125           | .125           | .125           |
| Ethnicity<br>(white)                    |                |                |          |            | 1.186<br>(.106) | .056           | .065           | .112           | 1.144<br>(.096) | .11            | .128           | .22            |
| Political<br>ideology<br>(conservatism) |                |                |          |            |                 |                |                |                | .962<br>(.121)  | .758           | .758           | .876           |
| US residency                            |                |                |          |            |                 |                |                |                | .83<br>(.062)   | <b>1.2e-02</b> | .084           | .084           |
| Education<br>(college<br>degree)        |                |                |          |            |                 |                |                |                | .956<br>(.094)  | .644           | .796           | 1              |
| Income                                  |                |                |          |            |                 |                |                |                | .746<br>(.067)  | <b>1.1e-03</b> | <b>7.6e-03</b> | <b>7.6e-03</b> |
| Log (time to<br>complete the<br>survey) |                |                |          |            |                 |                |                |                | .757<br>(.101)  | <b>3.7e-02</b> | .084           | .222           |

**Supplementary Table 10. Days on Twitter.** Results are generated using negative binominal regression taking users' z-scored CRT score as independent variable. Model 1) no controls; Model 2) controlling for age, gender, and ethnicity; Model 3) controlling for age, gender, ethnicity, US residency, education, social/economic conservatism, Income, and Log (time to complete the survey). *p*-values are reported based on two-tailed z-test and are also adjusted for multi-comparisons:  $p_{BH}$  is corrected *p*-value using Bonferroni-Holms and  $p_{Holm}$  using Benjamini Hochberg procedure.

|                                                  | Model 1         |          |          |            | Model 2         |                |                |                | Model 3         |                |                |                |
|--------------------------------------------------|-----------------|----------|----------|------------|-----------------|----------------|----------------|----------------|-----------------|----------------|----------------|----------------|
|                                                  | IRR<br>(SE)     | <i>p</i> | $p_{BH}$ | $p_{Holm}$ | IRR<br>(SE)     | <i>p</i>       | $p_{BH}$       | $p_{Holm}$     | IRR<br>(SE)     | <i>p</i>       | $p_{BH}$       | $p_{Holm}$     |
| <i>CRT</i>                                       | 1.012<br>(.011) | .274     | .458     | 1          | 1.02<br>(.011)  | .072           | .252           | .432           | 1.016<br>(.011) | .135           | .341           | .81            |
| <i>Age</i>                                       |                 |          |          |            | 1.084<br>(.011) | <b>2.0e-16</b> | <b>1.4e-15</b> | <b>1.4e-15</b> | 1.096<br>(.011) | <b>1.1e-19</b> | <b>7.8e-19</b> | <b>7.8e-19</b> |
| <i>Gender<br/>(female)</i>                       |                 |          |          |            | 1.038<br>(.011) | <b>7.3e-04</b> | <b>1.0e-03</b> | <b>2.2e-03</b> | 1.033<br>(.011) | <b>3.3e-03</b> | <b>4.6e-03</b> | <b>1.0e-02</b> |
| <i>Ethnicity<br/>(white)</i>                     |                 |          |          |            | 1.037<br>(.013) | <b>4.5e-03</b> | <b>6.3e-03</b> | <b>1.3e-02</b> | 1.031<br>(.013) | <b>1.6e-02</b> | <b>2.3e-02</b> | <b>4.9e-02</b> |
| <i>Political<br/>ideology<br/>(conservatism)</i> |                 |          |          |            |                 |                |                |                | .967<br>(.01)   | <b>1.6e-03</b> | <b>5.7e-03</b> | <b>9.7e-03</b> |
| <i>US residency</i>                              |                 |          |          |            |                 |                |                |                | 1.001<br>(.011) | .951           | .951           | 1              |
| <i>Education<br/>(college<br/>degree)</i>        |                 |          |          |            |                 |                |                |                | 1.01<br>(.011)  | .358           | .626           | 1              |
| <i>Income</i>                                    |                 |          |          |            |                 |                |                |                | .983<br>(.011)  | .13            | .228           | .6             |
| <i>Log (time to<br/>complete the<br/>survey)</i> |                 |          |          |            |                 |                |                |                | .962<br>(.011)  | <b>9.5e-04</b> | <b>6.7e-03</b> | <b>6.7e-03</b> |

**Supplementary Table 11. Logistic regression predicting if the account belongs to low CRT cluster using the average characteristics of their followers in our sample (threshold of number of followers from our sample  $K=25$ ). Model 1) no controls; Model 2) controlling for age (average age of followers), gender (male fraction of followers), and ethnicity (white fraction of followers); Model 3) age (average age of followers), gender (male fraction of followers), and ethnicity (white fraction of followers), US residency (US resident fraction of followers), education (college degree fraction of followers), social/economic conservatism (average conservatism of followers), Income (average Income of followers), and average log (time to complete the survey) of followers. *p*-values are reported based on two-tailed *z*-test and without multi-comparisons adjustment.**

|                                         | Model 1         |                | Model 2          |                | Model 3         |                |
|-----------------------------------------|-----------------|----------------|------------------|----------------|-----------------|----------------|
|                                         | OR<br>(SE)      | <i>p</i>       | OR<br>(SE)       | <i>p</i>       | OR<br>(SE)      | <i>p</i>       |
| (intercept)                             | 2.038<br>(.068) | <b>0.0e+00</b> | .842<br>(.134)   | .199           | 1.101<br>(.162) | .554           |
| CRT                                     | .090<br>(.117)  | <b>0.0e+00</b> | .264<br>(.172)   | <b>0.0e+00</b> | .545<br>(.208)  | <b>3.5e-03</b> |
| Age                                     |                 |                | 3.065<br>(.128)  | <b>0.0e+00</b> | 3.463<br>(.151) | <b>0.0e+00</b> |
| Gender<br>(female)                      |                 |                | 28.168<br>(.279) | <b>0.0e+00</b> | 16.38<br>(.294) | <b>0.0e+00</b> |
| Ethnicity<br>(white)                    |                 |                | 2.145<br>(.192)  | <b>6.7e-05</b> | 1.014<br>(.239) | .953           |
| Political<br>ideology<br>(conservatism) |                 |                |                  |                | 1.308<br>(.185) | .146           |
| US residency                            |                 |                |                  |                | .923<br>(.342)  | .814           |
| Education<br>(college<br>degree)        |                 |                |                  |                | 1.498<br>(.193) | <b>3.6e-02</b> |
| Income                                  |                 |                |                  |                | .230<br>(.232)  | <b>2.0e-10</b> |
| Log (time to<br>complete the<br>survey) |                 |                |                  |                | .332<br>(.157)  | <b>0.0e+00</b> |

**Supplementary Table 12. Characteristics of clusters within co-followers' network for various threshold of number of followers K.** We included accounts in the network who had at least K followers from our sample. Model 1) no controls; Model 2) controlling for age (average age of followers), gender (male fraction of followers), and ethnicity (white fraction of followers); Model 3) age (average age of followers), gender (male fraction of followers), and ethnicity (white fraction of followers), US residency (US resident fraction of followers), education (college degree fraction of followers), social/economic conservatism (average conservatism of followers), Income (average Income of followers), and average log (time to complete the survey) of followers. Across all values of the threshold for the number of followers, there exists one cluster with high average follower CRT score and one with low average follower CRT score. The average CRT of followers can significantly predict which of the two clusters the accounts belongs to. p-values are reported based on two-tailed z-test and without multi-comparisons adjustment (\* $p < .05$ , \*\* $p < .01$ , \*\*\* $p < .001$ ).

| Threshold (K) | Cluster   | CRT  |      | Fraction of nodes in the cluster | Total nodes | Model 1 OR (SE)     | Model 2 OR (SE)    | Model 3 OR (SE)    |
|---------------|-----------|------|------|----------------------------------|-------------|---------------------|--------------------|--------------------|
|               |           | Mean | SD   |                                  |             |                     |                    |                    |
| 30            | Cluster 1 | .52  | .072 | .379                             | 1286        | 17.174***<br>(.164) | 4.415***<br>(.238) | 1.793*<br>(.291)   |
|               | Cluster 2 | .42  | .029 | .621                             | 1286        | .058***<br>(.164)   | .227***<br>(.238)  | .558*<br>(.291)    |
| 25            | Cluster 1 | .515 | .075 | .35                              | 1860        | 11.102***<br>(.117) | 3.791***<br>(.172) | 1.835**<br>(.208)  |
|               | Cluster 2 | .419 | .032 | .65                              | 1860        | .09***<br>(.117)    | .264***<br>(.172)  | .545**<br>(.208)   |
| 20            | Cluster 1 | .517 | .082 | .316                             | 2802        | 8.464***<br>(.085)  | 3.296***<br>(.119) | 1.966***<br>(.142) |
|               | Cluster 2 | .422 | .035 | .237                             | 2802        | .523***<br>(.06)    | .669***<br>(.095)  | .524***<br>(.115)  |
|               | Cluster 3 | .416 | .037 | .447                             | 2802        | .295***<br>(.063)   | .562***<br>(.083)  | .878<br>(.098)     |
| 15            | Cluster 1 | .512 | .089 | .314                             | 4294        | 5.711***<br>(.058)  | 2.326***<br>(.079) | 1.585***<br>(.095) |
|               | Cluster 2 | .419 | .04  | .243                             | 4294        | .539***<br>(.046)   | .699***<br>(.069)  | .559***<br>(.08)   |
|               | Cluster 3 | .419 | .046 | .198                             | 4294        | .563***<br>(.049)   | .814**<br>(.06)    | .844*<br>(.073)    |
|               | Cluster 4 | .414 | .043 | .245                             | 4294        | .462***<br>(.049)   | .659***<br>(.069)  | 1.065<br>(.083)    |
| 10            | Cluster 1 | .512 | .102 | .338                             | 7207        | 4.171***<br>(.038)  | 1.903***<br>(.053) | 1.287***<br>(.063) |
|               | Cluster 2 | .418 | .051 | .233                             | 7207        | .57***<br>(.034)    | .715***<br>(.047)  | .648***<br>(.053)  |
|               | Cluster 3 | .417 | .054 | .21                              | 7207        | .573***<br>(.036)   | .887**<br>(.044)   | .904<br>(.052)     |
|               | Cluster 4 | .415 | .055 | .22                              | 7207        | .538***<br>(.036)   | .713***<br>(.048)  | .978<br>(.056)     |

**Supplementary Table 13. Predicting if the user tweeted from a news website using logistic regression.** Model 1) no controls; Model 2) controlling for age, gender, and ethnicity; Model 3) controlling for age, gender, ethnicity, US residency, education, social/economic conservatism, Income, and Log (time to complete the survey). *p*-values are reported based on z-test and without multi-comparisons adjustment.

|                                         | Model 1         |                | Model 2         |                | Model 3         |                |
|-----------------------------------------|-----------------|----------------|-----------------|----------------|-----------------|----------------|
|                                         | OR<br>(SE)      | <i>p</i>       | OR<br>(SE)      | <i>p</i>       | OR<br>(SE)      | <i>p</i>       |
| (intercept)                             | .62<br>(.047)   | <b>4.5e-24</b> | .612<br>(.048)  | <b>1.7e-24</b> | .606<br>(.049)  | <b>6.5e-25</b> |
| CRT                                     | 1.105<br>(.047) | <b>3.5e-02</b> | 1.15<br>(.049)  | <b>4.2e-03</b> | 1.135<br>(.05)  | <b>1.1e-02</b> |
| Age                                     |                 |                | 1.304<br>(.049) | <b>4.9e-08</b> | 1.389<br>(.051) | <b>1.1e-10</b> |
| Gender<br>(female)                      |                 |                | 1.193<br>(.049) | <b>2.9e-04</b> | 1.163<br>(.05)  | <b>2.4e-03</b> |
| Ethnicity<br>(white)                    |                 |                | 1.038<br>(.05)  | .451           | 1.026<br>(.051) | .623           |
| Political ideology<br>(conservatism)    |                 |                |                 |                | .784<br>(.05)   | <b>1.4e-06</b> |
| US residency                            |                 |                |                 |                | 1.006<br>(.049) | .902           |
| Education<br>(college degree)           |                 |                |                 |                | 1.076<br>(.051) | .149           |
| Income                                  |                 |                |                 |                | .96<br>(.051)   | .422           |
| Log (time to<br>complete the<br>survey) |                 |                |                 |                | .857<br>(.051)  | <b>2.3e-03</b> |

**Supplementary Table 14. Predicting quality score of the tweeted outlet using linear regression with standard errors clustered on user. Model 1) no control; Model 2) controlling for age, gender, and ethnicity; Model 3) controlling for age, gender, ethnicity, US residency, education, social/economic conservatism, Income, and Log (time to complete the survey). *p*-values are reported based on *t*-test and without multi-comparisons adjustment.**

|                                         | Model 1         |                | Model 2         |                | Model 3         |                | Model 3 + months dummies |                |
|-----------------------------------------|-----------------|----------------|-----------------|----------------|-----------------|----------------|--------------------------|----------------|
|                                         | $\beta$<br>(SE) | <i>p</i>       | $\beta$<br>(SE) | <i>p</i>       | $\beta$<br>(SE) | <i>p</i>       | $\beta$<br>(SE)          | <i>p</i>       |
| (intercept)                             | 0<br>(.047)     | 1              | 0<br>(.044)     | 1              | 0<br>(.038)     | 1              | .116<br>(.147)           | .43            |
| CRT                                     | .101<br>(.04)   | <b>9.7e-03</b> | .088<br>(.036)  | <b>1.2e-02</b> | .09<br>(.036)   | <b>1.2e-02</b> | .078<br>(.034)           | <b>1.9e-02</b> |
| Age                                     |                 |                | -.061<br>(.043) | .157           | -.018<br>(.041) | .66            | -.013<br>(.038)          | .734           |
| Gender<br>(female)                      |                 |                | .014<br>(.043)  | .75            | .026<br>(.038)  | .49            | .001<br>(.031)           | .987           |
| Ethnicity<br>(white)                    |                 |                | .061<br>(.053)  | .249           | .005<br>(.044)  | .904           | -.004<br>(.04)           | .929           |
| Political<br>ideology<br>(conservatism) |                 |                |                 |                | -.181<br>(.049) | <b>1.9e-04</b> | -.177<br>(.046)          | <b>1.2e-04</b> |
| US residency                            |                 |                |                 |                | -.091<br>(.041) | <b>2.6e-02</b> | -.078<br>(.036)          | <b>3.0e-02</b> |
| Education<br>(college<br>degree)        |                 |                |                 |                | .057<br>(.042)  | .175           | .055<br>(.039)           | .163           |
| Income                                  |                 |                |                 |                | .017<br>(.039)  | .657           | .025<br>(.038)           | .522           |
| Log (time to<br>complete the<br>survey) |                 |                |                 |                | -.062<br>(.034) | .071           | -.07<br>(.031)           | <b>2.4e-02</b> |
| Month<br>dummies                        | No              |                | No              |                | No              |                | Yes                      |                |

**Supplementary Table 15. Topic positively and negatively related to CRT vs. various number of topics in the model. In all cases, there is always one topic (related to political engagement) that is positively correlated with CRT and one topic (related to “get rich quick” schemes) that is negatively related to CRT ( $p < .1$ ,  $*p < .05$ ,  $**p < .01$ ,  $***p < .001$ ;  $p$ -values are reported based on  $t$ -test and without multi-comparisons adjustment.)**

| Number of topics, $k$ | Representative words for each topic                                                                                                                | Coefficient of estimating topic proportion using CRT |
|-----------------------|----------------------------------------------------------------------------------------------------------------------------------------------------|------------------------------------------------------|
| 5                     | <b>peopl, will, amp, can, just, like, say, trump, one, get, now, need, vote, time, make, think, year, know, right, want</b>                        | .10***                                               |
|                       | <b>follow, amp, enter, giveaway, chanc, competit, end, retweet, winner, give, prize, simpli, just, freebiefriday, day, like, tampc, away, time</b> | -.076**                                              |
|                       | just, get, like, one, love, can, time, day, now, dont, good, look, think, know, will, see, make, want, got, need                                   | .071*                                                |
|                       | via, just, thank, free, earn, new, get, check, today, amp, love, great, book, can, day, blog, use, now, make, sponsor                              | -.077***                                             |
|                       | game, youtub, new, video, play, amp, watch, just, end, call, like, live, now, artist, onlin, one, top, playlist, wwe, run                          | -.021 (not sig.)                                     |
| 6                     | <b>peopl, will, amp, trump, just, say, can, like, vote, get, one, now, need, make, think, right, time, know, want, year</b>                        | .080**                                               |
|                       | <b>follow, amp, enter, competit, chanc, giveaway, end, retweet, winner, give, simpli, freebiefriday, prize, like, just, day, tampc, away, good</b> | -.075**                                              |
|                       | just, like, get, one, love, dont, time, can, now, know, day, think, good, want, peopl, look, make, got, will, see                                  | .070*                                                |
|                       | thank, day, amp, love, get, can, look, new, just, today, one, now, will, time, book, good, great, work, via, see                                   | .010 (not sig.)                                      |
|                       | youtub, game, new, video, thank, amp, music, like, follow, now, today, get, via, art, can, will, play, end, live, can, check                       | -.042*                                               |
| 7                     | <b>peopl, will, amp, trump, say, can, just, vote, like, now, one, get, need, right, make, think, time, brexit, want, know</b>                      | .076**                                               |
|                       | <b>follow, amp, enter, competit, chanc, giveaway, end, retweet, winner, give, simpli, freebiefriday, prize, like, just, day, tampc, good, away</b> | -.064**                                              |
|                       | get, just, will, now, day, today, one, good, time, look, can, amp, see, well, thank, love, year, back, last, week                                  | .009 (not sig.)                                      |
|                       | thank, via, book, amp, new, read, love, can, day, look, work, one, great, use, help, write, make, get, today, blog                                 | <.001 (not sig.)                                     |
|                       | just, like, get, one, love, dont, can, know, time, think, day, peopl, want, now, make, good, realli, thing, look, got                              | .066*                                                |
| 8                     | youtub, game, new, video, like, music, follow, now, thank, get, play, amp, today, check, will, end, live, art, can, free                           | -.037                                                |
|                       | win, giveaway, enter, just, earn, free, chanc, via, amp, gift, card, check, sponsor, get, prize, cash, want, love, can, amazon                     | -.046*                                               |
|                       | <b>peopl, like, just, trump, will, one, say, can, get, know, make, dont, think, realdonaldtrump, want, time, need, thing, right, amp</b>           | .054**                                               |
|                       | <b>follow, amp, competit, enter, chanc, giveaway, end, retweet, winner, give, simpli, freebiefriday, prize, tampc, like, day, just, good, time</b> | -.066**                                              |
|                       | amp, will, peopl, brexit, can, vote, now, pleas, get, one, say, just, year, need, time, think, like, support, nhs, make                            | .056**                                               |
| 9                     | just, get, like, love, one, day, can, now, time, think, look, dont, look, good, know, got, need, work, want, will, today                           | .028 (not sig.)                                      |
|                       | game, like, just, get, play, one, new, time, will, good, now, can, fuck, amp, watch, see, look, year, dont, end                                    | .011 (not sig.)                                      |
|                       | Thank, youtub, new, via, video, today, use, music, get, work, can, amp, great, follow, look, art, now, will, make, free                            | -.038*                                               |
|                       | win, giveaway, enter, chanc, amp, free, just, gift, card, sponsor, check, follow, via, want, prize, get, can, game, now, new                       | -.020 (not sig.)                                     |
|                       | just, via, book, earn, read, new, love, blog, review, write, thank, amp, watch, check, today, great, mile, day, get, post                          | -.017 (not sig.)                                     |
| 10                    | <b>peopl, will, amp, trump, say, vote, just, can, now, like, one, get, need, brexit, think, realdonaldtrump, right, make, time, year</b>           | .064**                                               |
|                       | <b>follow, amp, competit, enter, chanc, giveaway, end, retweet, winner, give, simpli, freebiefriday, prize, tampc, day, like, just, time, good</b> | -.070**                                              |
|                       | thank, new, amp, can, work, use, today, great, get, will, make, music, time, one, look, now, art, write, help, read                                | .018 (not sig.)                                      |
|                       | amp, game, will, get, team, win, play, one, today, good, see, look, great, just, time, fan, now, year, last, new                                   | <.001 (not sig.)                                     |
|                       | just, get, love, day, one, like, now, can, time, think, look, dont, good, will, got, know, need, today, work, thank                                | .011 (not sig.)                                      |
| 10                    | like, just, get, one, dont, time, can, know, peopl, love, make, want, fuck, now, think, thing, good, day, realli, look                             | .067*                                                |
|                       | via, amp, love, new, day, thank, sponsor, free, get, dog, can, look, great, make, help, tri, beauti, today, want, food                             | -.041*                                               |
|                       | just, earn, via, book, check, watch, cash, read, review, free, mile, get, today, blog, onlin, call, topcashback, reward, prize, awesom             | -.032*                                               |
|                       | in, giveaway, enter, chanc, follow, youtub, amp, free, game, card, gift, just, video, end, retweet, like, new, now, can, contest                   | -.018 (not sig.)                                     |
|                       | <b>peopl, will, amp, trump, say, vote, just, can, now, like, one, get, need, brexit, think, right, realdonaldtrump, make, time, year</b>           | .064**                                               |
| 10                    | <b>follow, amp, competit, enter, chanc, giveaway, end, retweet, winner, give, simpli, freebiefriday, prize, tampc, like, day, just, time, good</b> | -.069**                                              |
|                       | thank, new, use, can, work, today, amp, get, music, great, will, make, look, now, help, via, need, time, news, follow                              | .001 (not sig.)                                      |
|                       | game, will, amp, get, win, team, play, good, today, fan, one, see, just, time, great, season, look, last, day, year                                | .001 (not sig.)                                      |
|                       | book, read, via, new, amp, write, one, love, thank, just, day, review, blog, call, like, time, post, can, year, thing                              | .012 (not sig.)                                      |
|                       | just, get, love, day, like, now, one, can, time, think, look, dont, good, will, got, today, need, work, know, thank                                | .064*                                                |
| 10                    | via, amp, love, new, sponsor, day, thank, dog, free, get, help, can, make, great, look, tri, want, food, today, pleas                              | -.037*                                               |
|                       | win, giveaway, enter, chanc, follow, amp, free, youtub, game, gift, card, just, retweet, end, new, like, prize, contest, winner, want              | -.015 (not sig.)                                     |
|                       | just, earn, check, via, cash, watch, free, get, mile, today, reward, topcashback, awesom, download, won, walk, prize, game, ipad, site             | -.032*                                               |
|                       | like, just, get, one, dont, time, can, know, peopl, love, make, want, fuck, now, think, thing, good, day, realli, look                             | .0178 *                                              |

**Supplementary Table 16. Use of insight words and CRT.** Predicting use of LIWC word categories taking users' z-scored CRT score as independent variable using logistic regression at tweet-level with standard error cluster on username. Model 1) no controls; Model 2) controlling for age, gender, and ethnicity; Model 3) controlling for age, gender, ethnicity, US residency, education, social/economic conservatism, income, and Log (time to complete the survey). *p*-values are reported based on two-tailed z-test and are also adjusted for multi-comparisons:  $p_{BH}$  is corrected *p*-value using Bonferroni-Holms and  $p_{Holm}$  using Benjamini Hochberg procedure.

|                                         | Model 1         |                |                |                | Model 2         |                |                |                | Model 3         |                |                |                | Model 3 + months dummies |                |                |                |
|-----------------------------------------|-----------------|----------------|----------------|----------------|-----------------|----------------|----------------|----------------|-----------------|----------------|----------------|----------------|--------------------------|----------------|----------------|----------------|
|                                         | OR<br>(SE)      | <i>p</i>       | $p_{BH}$       | $p_{Holm}$     | OR<br>(SE)      | <i>p</i>       | $p_{BH}$       | $p_{Holm}$     | OR<br>(SE)      | <i>p</i>       | $p_{BH}$       | $p_{Holm}$     | OR<br>(SE)               | <i>p</i>       | $p_{BH}$       | $p_{Holm}$     |
| (intercept)                             | .134<br>(.026)  | <b>0.0e+00</b> | <b>0.0e+00</b> | <b>0.0e+00</b> | .134<br>(.026)  | <b>0.0e+00</b> | <b>0.0e+00</b> | <b>0.0e+00</b> | .133<br>(.025)  | <b>0.0e+00</b> | <b>0.0e+00</b> | <b>0.0e+00</b> | .091<br>(.051)           | <b>0.0e+00</b> | <b>0.0e+00</b> | <b>0.0e+00</b> |
| CRT                                     | 1.159<br>(.025) | <b>6.0e-09</b> | <b>4.2e-08</b> | <b>4.2e-08</b> | 1.157<br>(.026) | <b>2.5e-08</b> | <b>1.7e-07</b> | <b>1.7e-07</b> | 1.137<br>(.025) | <b>3.0e-07</b> | <b>2.1e-06</b> | <b>2.1e-06</b> | 1.138<br>(.025)          | <b>2.0e-07</b> | <b>1.4e-06</b> | <b>1.4e-06</b> |
| Age                                     |                 |                |                |                | .964<br>(.029)  | .21            | .245           | .42            | .979<br>(.028)  | .458           | .458           | .76            | .955<br>(.026)           | .076           | .089           | .152           |
| Gender<br>(female)                      |                 |                |                |                | .984<br>(.025)  | .508           | .593           | 1              | .976<br>(.024)  | .328           | .459           | 1              | .973<br>(.023)           | .24            | .42            | .96            |
| Ethnicity<br>(white)                    |                 |                |                |                | .979<br>(.018)  | .249           | .249           | .249           | .985<br>(.02)   | .437           | .437           | .437           | .985<br>(.018)           | .388           | .388           | .388           |
| Political<br>ideology<br>(conservatism) |                 |                |                |                |                 |                |                |                | .874<br>(.027)  | <b>5.6e-07</b> | <b>2.0e-06</b> | <b>3.4e-06</b> | .880<br>(.027)           | <b>1.7e-06</b> | <b>6.0e-06</b> | <b>1.0e-05</b> |
| US residency                            |                 |                |                |                |                 |                |                |                | 1.029<br>(.021) | .17            | .238           | .51            | 1.032<br>(.02)           | .115           | .161           | .345           |
| Education<br>(college<br>degree)        |                 |                |                |                |                 |                |                |                | 1.046<br>(.026) | .079           | .354           | .553           | 1.05<br>(.025)           | <b>.047</b>    | .329           | .329           |
| Income                                  |                 |                |                |                |                 |                |                |                | .992<br>(.027)  | .759           | .971           | 1              | .995<br>(.026)           | .835           | .977           | 1              |
| Log (time to<br>complete the<br>survey) |                 |                |                |                |                 |                |                |                | 1.038<br>(.026) | .141           | .197           | .423           | 1.047<br>(.026)          | .074           | .13            | .296           |
| Months<br>dummies                       |                 | No             |                |                |                 | No             |                |                |                 | No             |                |                |                          | Yes            |                |                |

**Supplementary Table 17. Use of inhibition words and CRT.** Predicting use of LIWC word categories taking users' z-scored CRT score as independent variable using logistic regression at tweet-level with standard error cluster on username. Model 1) no controls; Model 2) controlling for age, gender, and ethnicity; Model 3) controlling for age, gender, ethnicity, US residency, education, social/economic conservatism, income, and Log (time to complete the survey). *p*-values are reported based on two-tailed *z*-test and are also adjusted for multi-comparisons:  $p_{BH}$  is corrected *p*-value using Bonferroni-Holms and  $p_{Holm}$  using Benjamini Hochberg procedure.

|                                         | Model 1         |                |                |                | Model 2         |                |                |                | Model 3         |                |                |                | Model 3 + month dummies |                |                |                |
|-----------------------------------------|-----------------|----------------|----------------|----------------|-----------------|----------------|----------------|----------------|-----------------|----------------|----------------|----------------|-------------------------|----------------|----------------|----------------|
|                                         | OR<br>(SE)      | <i>p</i>       | $p_{BH}$       | $p_{Holm}$     | OR<br>(SE)      | <i>p</i>       | $p_{BH}$       | $p_{Holm}$     | OR<br>(SE)      | <i>p</i>       | $p_{BH}$       | $p_{Holm}$     | OR<br>(SE)              | <i>p</i>       | $p_{BH}$       | $p_{Holm}$     |
| (intercept)                             | .072<br>(.031)  | <b>0.0e+00</b> | <b>0.0e+00</b> | <b>0.0e+00</b> | .072<br>(.029)  | <b>0.0e+00</b> | <b>0.0e+00</b> | <b>0.0e+00</b> | .071<br>(.029)  | <b>0.0e+00</b> | <b>0.0e+00</b> | <b>0.0e+00</b> | 0<br>(1.004)            | <b>3.0e-25</b> | <b>3.0e-25</b> | <b>3.0e-25</b> |
| CRT                                     | 1.138<br>(.029) | <b>7.9e-06</b> | <b>2.5e-05</b> | <b>4.8e-05</b> | 1.14<br>(.031)  | <b>1.9e-05</b> | <b>6.5e-05</b> | <b>1.1e-04</b> | 1.127<br>(.029) | <b>3.3e-05</b> | <b>1.2e-04</b> | <b>2.0e-04</b> | 1.133<br>(.028)         | <b>7.1e-06</b> | <b>1.9e-05</b> | <b>4.3e-05</b> |
| Age                                     |                 |                |                |                | 1.124<br>(.035) | <b>9.5e-04</b> | <b>1.7e-03</b> | <b>3.8e-03</b> | 1.141<br>(.034) | <b>1.1e-04</b> | <b>1.9e-04</b> | <b>4.3e-04</b> | 1.1<br>(.031)           | <b>2.1e-03</b> | <b>3.7e-03</b> | <b>8.5e-03</b> |
| Gender<br>(female)                      |                 |                |                |                | .997<br>(.031)  | .918           | .918           | 1              | .997<br>(.033)  | .919           | .919           | 1              | .991<br>(.03)           | .759           | .781           | 1              |
| Ethnicity<br>(white)                    |                 |                |                |                | .958<br>(.02)   | <b>2.9e-02</b> | <b>4.0e-02</b> | .087           | .972<br>(.02)   | .169           | .197           | .338           | .966<br>(.018)          | .062           | .087           | .186           |
| Political<br>ideology<br>(conservatism) |                 |                |                |                |                 |                |                |                | .883<br>(.033)  | <b>1.6e-04</b> | <b>3.3e-04</b> | <b>7.8e-04</b> | .893<br>(.032)          | <b>4.1e-04</b> | <b>7.2e-04</b> | <b>1.8e-03</b> |
| US residency                            |                 |                |                |                |                 |                |                |                | 1.077<br>(.024) | <b>2.4e-03</b> | <b>5.5e-03</b> | <b>1.2e-02</b> | 1.074<br>(.023)         | <b>2.2e-03</b> | <b>5.1e-03</b> | <b>1.1e-02</b> |
| Education<br>(college degree)           |                 |                |                |                |                 |                |                |                | .978<br>(.038)  | .557           | .886           | 1              | .991<br>(.034)          | .796           | .923           | 1              |
| Income                                  |                 |                |                |                |                 |                |                |                | 1.002<br>(.041) | .971           | .971           | 1              | 1.006<br>(.039)         | .873           | .977           | 1              |
| Log (time to<br>complete the<br>survey) |                 |                |                |                |                 |                |                |                | 1.052<br>(.029) | .082           | .144           | .328           | 1.06<br>(.028)          | <b>3.8e-02</b> | .089           | .19            |
| Months dummies                          |                 | No             |                |                |                 | No             |                |                |                 | No             |                |                |                         | Yes            |                |                |

**Supplementary Table 18. Use of positive emotion words and CRT.** Predicting use of LIWC word categories taking users' z-scored CRT score as independent variable using logistic regression at tweet-level with standard error cluster on username. Model 1) no controls; Model 2) controlling for age, gender, and ethnicity; Model 3) controlling for age, gender, ethnicity, US residency, education, social/economic conservatism, income, and Log (time to complete the survey). *p*-values are reported based on two-tailed *z*-test and are also adjusted for multi-comparisons: *p*<sub>BH</sub> is corrected *p*-value using Bonferroni-Holms and *p*<sub>Holm</sub> using Benjamini Hochberg procedure.

|                                         | Model 1         |                |                        |                          | Model 2         |                |                        |                          | Model 3         |                |                        |                          | Model 3 + month dummies |                |                        |                          |
|-----------------------------------------|-----------------|----------------|------------------------|--------------------------|-----------------|----------------|------------------------|--------------------------|-----------------|----------------|------------------------|--------------------------|-------------------------|----------------|------------------------|--------------------------|
|                                         | OR<br>(SE)      | <i>p</i>       | <i>p</i> <sub>BH</sub> | <i>p</i> <sub>Holm</sub> | OR<br>(SE)      | <i>p</i>       | <i>p</i> <sub>BH</sub> | <i>p</i> <sub>Holm</sub> | OR<br>(SE)      | <i>p</i>       | <i>p</i> <sub>BH</sub> | <i>p</i> <sub>Holm</sub> | OR<br>(SE)              | <i>p</i>       | <i>p</i> <sub>BH</sub> | <i>p</i> <sub>Holm</sub> |
| (intercept)                             | 1.133<br>(.032) | <b>7.7e-05</b> | <b>7.7e-05</b>         | <b>7.7e-05</b>           | 1.134<br>(.029) | <b>1.9e-05</b> | <b>1.9e-05</b>         | <b>1.9e-05</b>           | 1.135<br>(.029) | <b>9.1e-06</b> | <b>9.1e-06</b>         | <b>9.1e-06</b>           | .063<br>(.06)           | <b>0.0e+00</b> | <b>0.0e+00</b>         | <b>0.0e+00</b>           |
| CRT                                     | .915<br>(.033)  | <b>7.0e-03</b> | <b>8.2e-03</b>         | <b>1.4e-02</b>           | .941<br>(.032)  | .054           | .063                   | .108                     | .962<br>(.031)  | .217           | .253                   | .434                     | .966<br>(.029)          | .235           | .235                   | .46                      |
| Age                                     |                 |                |                        |                          | 1.141<br>(.029) | <b>6.4e-06</b> | <b>4.5e-05</b>         | <b>4.5e-05</b>           | 1.139<br>(.028) | <b>3.7e-06</b> | <b>8.6e-06</b>         | <b>2.1e-05</b>           | 1.118<br>(.028)         | <b>8.8e-05</b> | <b>3.1e-04</b>         | <b>5.3e-04</b>           |
| Gender<br>(female)                      |                 |                |                        |                          | 1.213<br>(.025) | <b>1.7e-14</b> | <b>1.2e-13</b>         | <b>1.2e-13</b>           | 1.203<br>(.025) | <b>2.8e-13</b> | <b>1.9e-12</b>         | <b>1.9e-12</b>           | 1.200<br>(.025)         | <b>2.5e-13</b> | <b>1.7e-12</b>         | <b>1.7e-12</b>           |
| Ethnicity<br>(white)                    |                 |                |                        |                          | 1.093<br>(.019) | <b>2.5e-06</b> | <b>1.7e-05</b>         | <b>1.7e-05</b>           | 1.073<br>(.019) | <b>2.8e-04</b> | <b>1.0e-03</b>         | <b>2.0e-03</b>           | 1.068<br>(.02)          | <b>9.8e-04</b> | <b>3.4e-03</b>         | <b>5.9e-03</b>           |
| Political<br>ideology<br>(conservatism) |                 |                |                        |                          |                 |                |                        |                          | 1.074<br>(.031) | <b>1.9e-02</b> | <b>2.2e-02</b>         | <b>3.8e-02</b>           | 1.079<br>(.03)          | <b>1.1e-02</b> | <b>1.3e-02</b>         | <b>2.1e-02</b>           |
| US residency                            |                 |                |                        |                          |                 |                |                        |                          | .93<br>(.022)   | <b>1.2e-03</b> | <b>4.4e-03</b>         | <b>7.5e-03</b>           | .924<br>(.022)          | <b>3.1e-04</b> | <b>1.1e-03</b>         | <b>1.8e-03</b>           |
| Education<br>(college degree)           |                 |                |                        |                          |                 |                |                        |                          | .954<br>(.029)  | .101           | .354                   | .606                     | .961<br>(.028)          | .152           | .532                   | .912                     |
| Income                                  |                 |                |                        |                          |                 |                |                        |                          | .938<br>(.028)  | <b>2.4e-02</b> | .168                   | .168                     | .945<br>(.027)          | <b>4.0e-02</b> | .14                    | .24                      |
| Log (time to<br>complete the<br>survey) |                 |                |                        |                          |                 |                |                        |                          | .931<br>(.03)   | <b>1.9e-02</b> | .066                   | .114                     | .935<br>(.028)          | <b>1.7e-02</b> | .06                    | .102                     |
| Months dummies                          |                 | No             |                        |                          |                 | No             |                        |                          |                 | No             |                        |                          |                         | Yes            |                        |                          |

**Supplementary Table 19. Use of negative emotion words and CRT.** Predicting use of LIWC word categories taking users' z-scored CRT score as independent variable using logistic regression at tweet-level with standard error cluster on username. Model 1) no controls; Model 2) controlling for age, gender, and ethnicity; Model 3) controlling for age, gender, ethnicity, US residency, education, social/economic conservatism, income, and Log (time to complete the survey). *p*-values are reported based on two-tailed z-test and are also adjusted for multi-comparisons:  $p_{BH}$  is corrected *p*-value using Bonferroni-Holms and  $p_{Holm}$  using Benjamini Hochberg procedure.

|                                         | Model 1        |                |                |                | Model 2         |                |                |                | Model 3         |                |                |                | Model 3 + month dummies |                 |                 |                 |
|-----------------------------------------|----------------|----------------|----------------|----------------|-----------------|----------------|----------------|----------------|-----------------|----------------|----------------|----------------|-------------------------|-----------------|-----------------|-----------------|
|                                         | OR<br>(SE)     | <i>p</i>       | $p_{BH}$       | $p_{Holm}$     | OR<br>(SE)      | <i>p</i>       | $p_{BH}$       | $p_{Holm}$     | OR<br>(SE)      | <i>p</i>       | $p_{BH}$       | $p_{Holm}$     | OR<br>(SE)              | <i>p</i>        | $p_{BH}$        | $p_{Holm}$      |
| (intercept)                             | .162<br>(.029) | <b>0.0e+00</b> | <b>0.0e+00</b> | <b>0.0e+00</b> | .161 (.03)      | <b>0.0e+00</b> | <b>0.0e+00</b> | <b>0.0e+00</b> | .16<br>(.029)   | <b>0.0e+00</b> | <b>0.0e+00</b> | <b>0.0e+00</b> | .134<br>(.055)          | <b>4.0e-294</b> | <b>5.6e-294</b> | <b>1.2e-293</b> |
| CRT                                     | 1.142<br>(.03) | <b>1.1e-05</b> | <b>2.5e-05</b> | <b>5.5e-05</b> | 1.137<br>(.031) | <b>2.8e-05</b> | <b>6.5e-05</b> | <b>1.4e-04</b> | 1.118<br>(.029) | <b>1.3e-04</b> | <b>2.3e-04</b> | <b>5.3e-04</b> | 1.124<br>(.029)         | <b>5.2e-05</b>  | <b>9.1e-05</b>  | <b>2.1e-04</b>  |
| Age                                     |                |                |                |                | .935<br>(.035)  | .052           | .073           | .156           | .956<br>(.034)  | .181           | .253           | .543           | .933<br>(.031)          | <b>2.8e-02</b>  | <b>3.9e-02</b>  | .084            |
| Gender<br>(female)                      |                |                |                |                | .962<br>(.028)  | .16            | .373           | .8             | .956<br>(.027)  | .099           | .231           | .495           | .953<br>(.026)          | .064            | .149            | .32             |
| Ethnicity<br>(white)                    |                |                |                |                | .948<br>(.02)   | <b>8.5e-03</b> | <b>1.5e-02</b> | <b>3.4e-02</b> | .955<br>(.021)  | <b>3.2e-02</b> | .056           | .128           | .954<br>(.02)           | <b>1.8e-02</b>  | <b>3.1e-02</b>  | .072            |
| Political<br>ideology<br>(conservatism) |                |                |                |                |                 |                |                |                | .856<br>(.03)   | <b>2.8e-07</b> | <b>2.0e-06</b> | <b>2.0e-06</b> | .862<br>(.03)           | <b>6.3e-07</b>  | <b>4.4e-06</b>  | <b>4.4e-06</b>  |
| US residency                            |                |                |                |                |                 |                |                |                | 1.054<br>(.025) | <b>3.8e-02</b> | .066           | .152           | 1.056<br>(.024)         | <b>2.4e-02</b>  | <b>4.3e-02</b>  | .096            |
| Education<br>(college<br>degree)        |                |                |                |                |                 |                |                |                | 1.009<br>(.029) | .759           | .886           | 1              | 1.013<br>(.028)         | .64             | .923            | 1               |
| Income                                  |                |                |                |                |                 |                |                |                | .994<br>(.03)   | .852           | .971           | 1              | .999<br>(.029)          | .977            | .977            | 1               |
| Log (time to<br>complete the<br>survey) |                |                |                |                |                 |                |                |                | 1.027<br>(.028) | .34            | .397           | .68            | 1.033<br>(.028)         | .259            | .302            | .518            |
| Months<br>dummies                       |                | No             |                |                |                 | No             |                |                |                 | No             |                |                |                         | Yes             |                 |                 |

**Supplementary Table 20. Use of moral words and CRT.** Predicting use of LIWC word categories taking users' z-scored CRT score as independent variable using logistic regression at tweet-level with standard error cluster on username. Model 1) no controls; Model 2) controlling for age, gender, and ethnicity; Model 3) controlling for age, gender, ethnicity, US residency, education, social/economic conservatism, income, and Log (time to complete the survey). *p*-values are reported based on two-tailed *z*-test and are also adjusted for multi-comparisons: *p*<sub>BH</sub> is corrected *p*-value using Bonferroni-Holms and *p*<sub>Holm</sub> using Benjamini Hochberg procedure.

|                                         | Model 1         |          |                        |                          | Model 2         |          |                        |                          | Model 3         |          |                        |                          | Model 3 + month dummies |          |                        |                          |
|-----------------------------------------|-----------------|----------|------------------------|--------------------------|-----------------|----------|------------------------|--------------------------|-----------------|----------|------------------------|--------------------------|-------------------------|----------|------------------------|--------------------------|
|                                         | OR<br>(SE)      | <i>P</i> | <i>p</i> <sub>BH</sub> | <i>p</i> <sub>Holm</sub> | OR<br>(SE)      | <i>P</i> | <i>p</i> <sub>BH</sub> | <i>p</i> <sub>Holm</sub> | OR<br>(SE)      | <i>P</i> | <i>p</i> <sub>BH</sub> | <i>p</i> <sub>Holm</sub> | OR<br>(SE)              | <i>P</i> | <i>p</i> <sub>BH</sub> | <i>p</i> <sub>Holm</sub> |
| (intercept)                             | .268<br>(.02)   | 0.0e+00  | 0.0e+00                | 0.0e+00                  | .267<br>(.019)  | 0.0e+00  | 0.0e+00                | 0.0e+00                  | .266<br>(.018)  | 0.0e+00  | 0.0e+00                | 0.0e+00                  | .189<br>(.036)          | 0.0e+00  | 0.0e+00                | 0.0e+00                  |
| CRT                                     | 1.072<br>(.018) | 1.1e-04  | 1.9e-04                | 4.3e-04                  | 1.079<br>(.018) | 4.4e-05  | 7.7e-05                | 1.8e-04                  | 1.074<br>(.018) | 8.9e-05  | 2.1e-04                | 4.5e-04                  | 1.078<br>(.017)         | 8.0e-06  | 1.9e-05                | 4.3e-05                  |
| Age                                     |                 |          |                        |                          | 1.097<br>(.022) | 2.9e-05  | 6.8e-05                | 1.5e-04                  | 1.108<br>(.022) | 3.4e-06  | 8.6e-06                | 2.1e-05                  | 1.081<br>(.021)         | 1.7e-04  | 3.9e-04                | 8.4e-04                  |
| Gender<br>(female)                      |                 |          |                        |                          | 1.025<br>(.021) | .227     | .397                   | .908                     | 1.022<br>(.021) | .317     | .459                   | 1                        | 1.018<br>(.02)          | .366     | .512                   | 1                        |
| Ethnicity<br>(white)                    |                 |          |                        |                          | .964<br>(.019)  | .059     | .069                   | .118                     | .967<br>(.021)  | .101     | .141                   | .303                     | .964<br>(.021)          | .075     | .088                   | .186                     |
| Political<br>ideology<br>(conservatism) |                 |          |                        |                          |                 |          |                        |                          | .938<br>(.02)   | 1.1e-03  | 1.6e-03                | 3.4e-03                  | .945<br>(.018)          | 2.0e-03  | 2.8e-03                | 5.9e-03                  |
| US residency                            |                 |          |                        |                          |                 |          |                        |                          | 1.024<br>(.021) | .254     | .296                   | .51                      | 1.022<br>(.02)          | .272     | .317                   | .544                     |
| Education<br>(college<br>degree)        |                 |          |                        |                          |                 |          |                        |                          | 1.003<br>(.02)  | .895     | .895                   | 1                        | 1.012<br>(.019)         | .533     | .923                   | 1                        |
| Income                                  |                 |          |                        |                          |                 |          |                        |                          | .981<br>(.023)  | .408     | .871                   | 1                        | .989<br>(.021)          | .594     | .977                   | 1                        |
| Log (time to<br>complete the<br>survey) |                 |          |                        |                          |                 |          |                        |                          | 1.008<br>(.019) | .666     | .666                   | .68                      | 1.015<br>(.018)         | .412     | .412                   | .518                     |
| Months<br>dummies                       |                 | No       |                        |                          |                 | No       |                        |                          |                 | No       |                        |                          |                         | Yes      |                        |                          |

**Supplementary Table 21. Use of political words and CRT.** Predicting use of LIWC word categories taking users' z-scored CRT score as independent variable using logistic regression at tweet-level with standard error cluster on username. Model 1) no controls; Model 2) controlling for age, gender, and ethnicity; Model 3) controlling for age, gender, ethnicity, US residency, education, social/economic conservatism, income, and Log (time to complete the survey). *p*-values are reported based on two-tailed z-test and are also adjusted for multi-comparisons:  $p_{BH}$  is corrected *p*-value using Bonferroni-Holms and  $p_{Holm}$  using Benjamini Hochberg procedure.

|                                         | Model 1         |          |          |            | Model 2         |          |          |            | Model 3         |          |          |            | Model 3 + month dummies |          |          |            |
|-----------------------------------------|-----------------|----------|----------|------------|-----------------|----------|----------|------------|-----------------|----------|----------|------------|-------------------------|----------|----------|------------|
|                                         | OR<br>(SE)      | <i>p</i> | $p_{BH}$ | $p_{Holm}$ | OR<br>(SE)      | <i>p</i> | $p_{BH}$ | $p_{Holm}$ | OR<br>(SE)      | <i>p</i> | $p_{BH}$ | $p_{Holm}$ | OR<br>(SE)              | <i>p</i> | $p_{BH}$ | $p_{Holm}$ |
| (intercept)                             | .092<br>(.06)   | 0.0e+00  | 0.0e+00  | 0.0e+00    | .088<br>(.054)  | 0.0e+00  | 0.0e+00  | 0.0e+00    | .083<br>(.054)  | 0.0e+00  | 0.0e+00  | 0.0e+00    | .118<br>(.112)          | 6.3e-81  | 7.4e-81  | 1.3e-80    |
| CRT                                     | 1.193<br>(.055) | 1.3e-03  | 1.9e-03  | 4.0e-03    | 1.177<br>(.06)  | 6.4e-03  | 8.9e-03  | 1.9e-02    | 1.157<br>(.057) | 1.0e-02  | 1.4e-02  | 3.1e-02    | 1.167<br>(.056)         | 5.6e-03  | 7.8e-03  | 1.7e-02    |
| Age                                     |                 |          |          |            | 1.333<br>(.066) | 1.5e-05  | 5.2e-05  | 9.0e-05    | 1.371<br>(.064) | 8.4e-07  | 5.8e-06  | 5.8e-06    | 1.329<br>(.062)         | 3.7e-06  | 2.6e-05  | 2.6e-05    |
| Gender<br>(female)                      |                 |          |          |            | .884<br>(.062)  | 4.7e-02  | .164     | .282       | .889<br>(.061)  | .055     | .192     | .33        | .882<br>(.059)          | 3.3e-02  | .116     | .198       |
| Ethnicity<br>(white)                    |                 |          |          |            | .867<br>(.047)  | 2.3e-03  | 5.4e-03  | 1.4e-02    | .909<br>(.042)  | 2.3e-02  | .054     | .115       | .9<br>(.041)            | 1.1e-02  | 2.6e-02  | .055       |
| Political<br>ideology<br>(conservatism) |                 |          |          |            |                 |          |          |            | .764<br>(.072)  | 1.9e-04  | 3.3e-04  | 7.8e-04    | .777<br>(.071)          | 3.7e-04  | 7.2e-04  | 1.8e-03    |
| US residency                            |                 |          |          |            |                 |          |          |            | 1.266<br>(.054) | 1.3e-05  | 9.4e-05  | 9.4e-05    | 1.245<br>(.053)         | 3.3e-05  | 2.3e-04  | 2.3e-04    |
| Education<br>(college<br>degree)        |                 |          |          |            |                 |          |          |            | .976<br>(.062)  | .693     | .886     | 1          | .994<br>(.059)          | .923     | .923     | 1          |
| Income                                  |                 |          |          |            |                 |          |          |            | .961<br>(.06)   | .498     | .871     | 1          | .97<br>(.057)           | .591     | .977     | 1          |
| Log (time to<br>complete the<br>survey) |                 |          |          |            |                 |          |          |            | 1.142<br>(.047) | 5.0e-03  | 3.5e-02  | 3.5e-02    | 1.153<br>(.046)         | 2.1e-03  | 1.5e-02  | 1.5e-02    |
| Months<br>dummies                       |                 | No       |          |            |                 | No       |          |            |                 | No       |          |            |                         | Yes      |          |            |

**Supplementary Table 22. Use of political words and political extremity (distance from the scale midpoint for the partisanship measure). Predicting use of LIWC word categories taking users' political extremity independent variable using logistic regression at tweet-level with standard error cluster on username. Model 1) no controls; Model 2) controlling for age, gender, and ethnicity; Model 3) controlling for age, gender, ethnicity, US residency, education, social/economic conservatism, income, and Log (time to complete the survey). p-values are reported based on two-tailed z-test.**

|                                   | Model 1      |                | Model 2      |                | Model 3      |                | Model 3 + month dummies |                |
|-----------------------------------|--------------|----------------|--------------|----------------|--------------|----------------|-------------------------|----------------|
|                                   | OR (SE)      | p              | OR (SE)      | p              | OR (SE)      | p              | OR (SE)                 | p              |
| (intercept)                       | .089 (.062)  | <b>0.0e+00</b> | .085 (.055)  | <b>0.0e+00</b> | .082 (.052)  | <b>0.0e+00</b> | .099 (.116)             | <b>4.3e-88</b> |
| Political extremity               | 1.341 (.059) | <b>6.9e-07</b> | 1.382 (.058) | <b>2.8e-08</b> | 1.25 (.093)  | <b>1.7e-02</b> | 1.235 (.09)             | <b>1.9e-02</b> |
| Age                               |              |                | 1.348 (.064) | <b>2.8e-06</b> | 1.346 (.066) | <b>6.9e-06</b> | 1.312 (.063)            | <b>1.7e-05</b> |
| Gender (female)                   |              |                | .844 (.056)  | <b>2.6e-03</b> | .859 (.059)  | <b>1.1e-02</b> | .85 (.058)              | <b>4.8e-03</b> |
| Ethnicity (white)                 |              |                | .874 (.047)  | <b>4.0e-03</b> | .916 (.043)  | <b>3.8e-02</b> | .907 (.043)             | <b>2.2e-02</b> |
| Political ideology (conservatism) |              |                |              |                | .877 (.095)  | .169           | .881 (.093)             | .172           |
| US residency                      |              |                |              |                | 1.245 (.056) | <b>8.0e-05</b> | 1.226 (.054)            | <b>1.8e-04</b> |
| Education (college degree)        |              |                |              |                | .976 (.063)  | .703           | .992 (.06)              | .899           |
| Income                            |              |                |              |                | .966 (.061)  | .57            | .978 (.058)             | .701           |
| Log (time to complete the survey) |              |                |              |                | 1.15 (.048)  | <b>3.5e-03</b> | 1.161 (.047)            | <b>1.5e-03</b> |
| Months dummies                    | No           |                | No           |                | No           |                | Yes                     |                |
